# Supplementary material
Source: PubMed Central journal article supplement (PMC2948063)
Supplement: NIHMS216770-supplement-SI.pdf [file NIHMS216770-supplement-SI.pdf]

**Supporting Information for**  
**Digital PCR on a SlipChip**

*Feng Shen, Wenbin Du, Jason E. Kreutz, Alice Fok, and Rustem F. Ismagilov*

Department of Chemistry and Institute for Biophysical Dynamics, The University of Chicago,

929 E 57th St, Chicago, Illinois 60637

**Derivation of Equation 1 to estimate template concentration:**

The Poisson equation (Equation S1),

$$p = (\lambda^k \cdot e^{-\lambda}) / k! \quad (\text{S1})$$

simplifies to  $\mathbf{p} = \mathbf{e}^{-\lambda}$  when  $\mathbf{k} = \mathbf{0}$ , where  $\mathbf{p}$  is the probability of having  $\mathbf{k}$  particles in a well given  $\lambda$ , the average concentration of particles per well. The average concentration is different at each dilution factor, but  $\lambda$  can be found using the expression  $\lambda = \mathbf{c} \cdot \mathbf{x}$ , where  $\mathbf{x}$  is the dilution factor of the original concentration,  $\mathbf{c}$ . Using  $\mathbf{s}/\mathbf{n}$  as an estimator of  $\mathbf{p}$ , where  $\mathbf{s}$  is the number of negative wells,  $\mathbf{f}$  is the number of positive wells, and  $\mathbf{n}$  is the total number of wells (so  $\mathbf{s} = \mathbf{n} - \mathbf{f}$ ), then Equation S2 is generated:

$$\frac{(n - f)}{n} = e^{-c \cdot x} \quad (\text{S2})$$

This equation can be linearized by taking the natural logarithm (ln) of both sides to give Equation S1 (also Equation 1 in the main text)

$$Y = \ln(n - f) = -c \cdot x + \ln n \quad (\text{S3, 1})$$

The y-intercept then gives the number of wells, so can be used to test the suitability of the equation, or used to constrain the fit based on the known  $\mathbf{n}$ . The slope then gives the negative concentration in terms of particles/well.

**Table S1. Number of positive wells in each quadrant of the SlipChip for various concentrations of genomic DNA and agreement with the 95% CI.**

|                                 | Number of positive wells in quadrant |             |            |             | Average # per quadrant | Score based 95% CI range |             | Rounded 95% CI |             |
|---------------------------------|--------------------------------------|-------------|------------|-------------|------------------------|--------------------------|-------------|----------------|-------------|
|                                 | Upper Left                           | Upper Right | Lower Left | Lower Right |                        | Lower limit              | Upper limit | Lower limit    | Upper limit |
| <b>1 fg/<math>\mu</math>L</b>   |                                      |             |            |             |                        |                          |             |                |             |
| Trial 1                         | 0                                    | 1           | 1          | 1           | 0.75                   | 0.11                     | 5.17        | 0              | 5           |
| Trial 2                         | 0                                    | 2           | 0          | 0           | 0.50                   | 0.05                     | 4.73        | 0              | 5           |
| Trial 3                         | 0                                    | 0           | 1          | 0           | 0.25                   | 0.01                     | 4.28        | 0              | 4           |
| Trial 4                         | 0                                    | 0           | 1          | 1           | 0.50                   | 0.05                     | 4.73        | 0              | 5           |
| <b>10 fg/<math>\mu</math>L</b>  |                                      |             |            |             |                        |                          |             |                |             |
| Trial 1                         | 3                                    | 5           | 5          | 4           | 4.25                   | 1.70                     | 10.49       | 2              | 10          |
| Trial 2                         | 5                                    | 4           | 3          | 0*          | 3.00                   | 1.02                     | 8.70        | 1              | 9           |
| Trial 3                         | 5                                    | 3           | 3          | 0*          | 2.75                   | 0.90                     | 8.33        | 1              | 8           |
| <b>100 fg/<math>\mu</math>L</b> |                                      |             |            |             |                        |                          |             |                |             |
| Trial 1                         | 24                                   | 21          | 22         | 16          | 20.75                  | 13.66                    | 31.14       | 14             | 31          |
| Trial 2                         | 18                                   | 22          | 19         | 26          | 21.25                  | 14.06                    | 31.73       | 14             | 32          |
| Trial 3                         | 19                                   | 13          | 15         | 24          | 17.75                  | 11.28                    | 27.59       | 11             | 28          |
| <b>1 pg/<math>\mu</math>L</b>   |                                      |             |            |             |                        |                          |             |                |             |
| Trial 1                         | 154                                  | 159         | 159        | 151         | 155.75                 | 138.38                   | 173.22      | 138            | 173         |
| Trial 2                         | 151                                  | 145         | 135        | 140         | 142.75                 | 125.63                   | 160.28      | 126            | 160         |
| Trial 3                         | 131                                  | 140         | 152        | 148         | 142.75                 | 125.63                   | 160.28      | 126            | 160         |

\*These values fell outside the CI.
